## RESEARCH ARTICLE

# Zoonotic enteric parasites in Mongolian people, animals, and the environment: Using One Health to address shared pathogens

Amber N. Barnes<sup>1,2,3</sup>\*, Anu Davaasuren<sup>1,4</sup>, Uyanga Baasandavga<sup>1,5</sup>, Paul M. Lantos<sup>2‡</sup>, Battsetseg Gonchigoo<sup>1‡</sup>, Gregory C. Gray<sup>2,6,7,8‡</sup>

**1** Institute of Veterinary Medicine, Ulaanbaatar, Mongolia, **2** School of Medicine, Duke University, Durham, North Carolina, United States of America, **3** Department of Public Health, University of North Florida, Jacksonville, Florida, United States of America, **4** National Center for Communicable Disease, Ulaanbaatar, Mongolia, **5** National Center for Zoonotic Disease, Ulaanbaatar, Mongolia, **6** Duke Global Health Institute, Duke University, Durham, North Carolina, United States of America, **7** Global Health Research Institute, Duke-Kunshan University, Kunshan, Jiangsu, China, **8** Emerging Infectious Diseases Program, Duke-NUS Medical School, Singapore

\* These authors contributed equally to this work.

‡ PML, BC and GCG also contributed equally to this work.

\* [amber.barnes@unf.edu](mailto:amber.barnes@unf.edu)

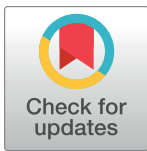

## OPEN ACCESS

**Citation:** Barnes AN, Davaasuren A, Baasandavga U, Lantos PM, Gonchigoo B, Gray GC (2021) Zoonotic enteric parasites in Mongolian people, animals, and the environment: Using One Health to address shared pathogens. *PLoS Negl Trop Dis* 15(7): e0009543. <https://doi.org/10.1371/journal.pntd.0009543>

**Editor:** Matthew C. Freeman, Emory University, UNITED STATES

**Received:** October 20, 2020

**Accepted:** June 7, 2021

**Published:** July 8, 2021

**Copyright:** © 2021 Barnes et al. This is an open access article distributed under the terms of the [Creative Commons Attribution License](https://creativecommons.org/licenses/by/4.0/), which permits unrestricted use, distribution, and reproduction in any medium, provided the original author and source are credited.

**Data Availability Statement:** Data cannot be shared publicly to protect the personal information of participants. Data are available from the Duke University Institutional Review Board ([ResearchServiceDesk@duke.edu](mailto:ResearchServiceDesk@duke.edu)) for researchers who meet the criteria for access to confidential data.

**Funding:** Funding for this work was provided by the USA National Institutes of Health, Fogarty International Center grant, D43TW009373, “One

## Abstract

### Background

*Cryptosporidium spp.* and *Giardia duodenalis* are important zoonotic enteric pathogens of One Health concern for humans, animals, and the environment. For this study, we investigated parasite prevalence and risk factors among rural, peri-urban, and urban households and environments of Mongolia.

### Methods

This cross-sectional study implemented a household risk factor survey at 250 home sites along with sample collection from humans, animals, flies, and drinking water. Multiplex real-time PCR analysis was conducted to look for *Cryptosporidium spp.* and/or *Giardia duodenalis* within household samples.

### Results

Lab analysis found one or both zoonotic parasites at 20% of the participating households (51/250). Human samples had a parasite prevalence of 6.4% (27/419), domestic animals at 3.3% (19/570), pooled filth flies at 14.8% (17/115), and drinking water samples at 2% (5/250). Parasite presence at the household was significantly associated with a household's use of an improved drinking water source (OR 0.27; CI 0.12–0.61;  $p < 0.01$ ), having an indoor handwashing site (OR 0.41; CI 0.19–0.92;  $p = 0.03$ ), domestic animal ownership (OR 2.40; CI 1.02–5.65;  $p = 0.05$ ), and rural location (OR 0.50; CI 0.25–0.98;  $p = 0.04$ ). Household use of an improved drinking water source remained significant in the multivariate model (OR 0.16; CI 0.04–0.68;  $p = 0.01$ ).

Health Innovation Fellowships for Zoonotic Disease Research in Mongolia” to GCG ([https://projectreporter.nih.gov/project\\_info\\_description.cfm?aid=8743364&icde=17876](https://projectreporter.nih.gov/project_info_description.cfm?aid=8743364&icde=17876) 817). The funders had no role in study design, data collection and analysis, decision to publish, or preparation of the manuscript.

**Competing interests:** The authors have declared that no competing interests exist.

## Conclusion

In Mongolia, public and veterinary health are intertwined, particularly for rural herding households. Increased access to safe water, sanitation and hygiene infrastructure could help prevent further transmission of zoonotic enteric parasites. Public health interventions, policy and messaging should utilize a One Health framework employing joint leadership from local human and animal health sectors.

## Author summary

The zoonotic enteric parasites of *Cryptosporidium spp.* and *Giardia duodenalis* are a One Health concern for human, animal and environmental health. In this study, human, animal, fly, and water samples were collected from 250 households in rural, peri-urban and urban areas of Mongolia in conjunction with a household risk factor survey. Twenty percent of the households (n = 51) had at least one sample positive for *Cryptosporidium spp.* and/or *Giardia duodenalis* with several households demonstrating parasite presence in multiple sample types (9.8%, 5/51). Households that used unimproved drinking water, did not have access to an indoor handwashing site, were located in rural areas, and owned animals were associated with higher rates of parasite presence. Our findings show that zoonotic enteric parasite exposure is occurring at the household level and from different hosts, vectors, and vehicles. Public health efforts to prevent the further spread of disease should concentrate on increased water, sanitation and hygiene measures and One Health collaboration between human and animal health care disciplines.

## Introduction

The gastrointestinal zoonotic parasites of *Cryptosporidium spp.* and *Giardia duodenalis* cause a significant portion of the diarrheal disease burden worldwide [1–2]. Between the years 2011 and 2016, *Cryptosporidium spp.* are estimated to have caused 63% of the reported global outbreaks of waterborne protozoal parasites while *Giardia spp.* were responsible for approximately 37% [3]. These pathogens have proven to be important etiological agents for childhood enteric disease, particularly among those living in households and communities that lack safe water, sanitation and hygiene [1,3–7]. Moderate to severe diarrheal disease from parasites such as *Cryptosporidium spp.* can increase a child’s risk of death by 8.5 to 12 times that of a child without diarrhea and limit their nutritional intake leading to stunted physical growth [1,5]. These protozoan parasites can be transmitted through contact with contaminated water, surfaces and fomites, filth flies and unwashed hands [2,8–12]. These pathogens also serve as a source of global foodborne disease [13–15].

*Cryptosporidium spp.* and *Giardia duodenalis* are resilient zoonotic enteric parasites (ZEPS) that can survive outside of a host from hours to months on surfaces, in soil, and in raw and potable water, regardless of chlorination [8,14,16–18]. The ownership and presence of domestic animals in close proximity to households presents an exposure risk for accidental fecal-oral ingestion from contact with unmanaged animal waste, whether directly through the collection of animal dung for cooking fuel or indirectly from drinking water from a contaminated source [6,19–20]. Wildlife, livestock, companion animals like dogs and cats, and synanthropic rodents

can all serve as disease hosts and can spread these pathogens to one another, to people, and into their environment making these zoonotic agents a true One Health challenge [21–24].

In Mongolia, the health of humans, animals, and the environment have been intertwined for millennia through the tradition of nomadic herding [25]. Although the nation has the second lowest population density in the world with slightly more than three million people, it is home to more than 66 million livestock [26–27]. Pastoralism and herding remain a popular livelihood and cultural practice within Mongolia, yet also present a unique threat for enteric zoonoses [28–32]. Close contact with free-grazing livestock occurs frequently at the household level as the animals are used for meat and milk, racing and herding, sale and trade, and the manufacture of animal goods such as leather and fiber [29,33–35]. The nomadic herding lifestyle often lead to interactions between domestic animals and wildlife across their many shared environments, particularly pasture and water sources, thus creating a risk for intraspecies transmission [36,37]. Endemic zoonotic diseases such as brucellosis, echinococcosis, plague, anthrax, and rabies are common and recent years have seen a growth in emerging and reemerging diseases of public health importance (e.g. Seoul hantavirus) [37–38]. However, diarrheal diseases are often unreported and undiagnosed in Mongolia, despite accounting for over 13% of all reported infectious disease [39]. Among hospitalized diarrheal patients in the capital city of Ulaanbaatar, the prevalence of *Cryptosporidium spp.* and *Giardia duodenalis* have been reported to be 3.6% and 5.1%, respectively [40]. In neighboring China, research has demonstrated an average prevalence of 2.97% for *Cryptosporidium spp.* and a range of 0.85% to 9.46% for *Giardia spp.* among patients [41–43].

Access to safe water, sanitation and hygiene services varies across the country with a stark divide between urban housing complexes and rural, nomadic, or off-grid *ger* (yurt) households [44]. Indiscriminate human and animal waste can be found in rural and peri-urban areas that lack sanitation and waste management systems designed to safely remove, store, and/or treat effluent. In addition, without safe water for drinking, cooking, and personal hygiene measures, it can be difficult to reduce the risk for enteric pathogen exposures in the household. In remote areas, seasonal drinking water sources are shared between animals and humans leading to collective exposure risks for ZEP transmission through contaminated water [35].

Understanding more about the ecology and epidemiology of zoonotic enteric parasites can help guide collaborative efforts between human and animal health care providers to prevent disease exposure and transmission. The purpose of this One Health study was to determine the prevalence of either *Cryptosporidium spp.* or *Giardia spp.* in humans, animals, and the environment of Mongolia and to identify household risk factors associated with pathogen presence.

## Methods

### Ethical approval

Approval for this study was granted through the ethics committees of Duke University [Protocol ID: PRO 00076868] and the Mongolian Ministry of Health. This study was exempt under the Institutional Animal Care and Use Committee (IACUC).

### Study setting and design

This cross-sectional study was conducted between April and October 2017 across four Mongolian provinces (*aimags*): Tov, Selenge, Zavkhan, and Dundgobi. The prevalence of *Cryptosporidium spp.* in the stool of individual gastrointestinal patients was estimated at 5% in a previous work conducted in Mongolia and was assumed a true prevalence and used to calculate a sample size for this study using OpenEpi Version 3 ([www.OpenEpi.com](http://www.OpenEpi.com)) [40]. The open

source calculator indicated at least 141 people would need to be sampled for 95% confidence intervals using a  $\pm 3.6\%$  prevalence window with 80% power. A total of 250 households participated in this study with 50 households at each site: urban apartments and a peri-urban ger district of the capital city Ulaanbaatar in Tov province and herding households among the rural provinces of Selenge, Zavkhan, and Dundgobi. Survey administration was seasonally divided with half of the sampling occurring from April through June and the other half occurring from August through October. A multistage sampling strategy was used to determine geographic clusters, determine the sampling district and community, and finally select participating households (Fig 1). Each participating household provided samples of drinking water, animal stool (if present), human stool, flies (if present), geographic location and household survey answers related to risk factors for zoonotic enteric parasite transmission during either the first or second sampling season.

Provinces were selected based on provincial governmental data on livestock density and human-animal interactions, representation of various ecosystems, a range of population demographics and household characteristics, and ability to safely travel to home sites. In rural provinces, animal herding is the primary occupation and human-animal contact occurs daily. However the ecology of the provinces varies greatly. The northern province of Selenge has taiga, forest, and mixed forest-grassland steppe while the western province of Zavkhan is situated in mountain steppe, the Gobi desert, and a large lake basin [45,46]. Dundgobi province is centrally located within the country and is made up of semi-arid steppe and low height hills. It is located between the desert and steppe areas [45,46].

Within the rural province sampling clusters, districts (*soums*), were ranked by highest to lowest animal density and one district was selected randomly from the highest 25% listed (Tsagaansuur in Selenge province, Tosontsengel in Zavkhan province, and Erdenedalai in Dundgovi province). Smaller administrative units under the district designation are rural communities (*baghs*). Using the same animal density ranking method and in consultation with local veterinarians on weather, safety and vehicle accessibility to herding households, two rural community locations were chosen within each district. At the rural community level, even smaller herding household groups known as *khot ails* are located across the landscape by

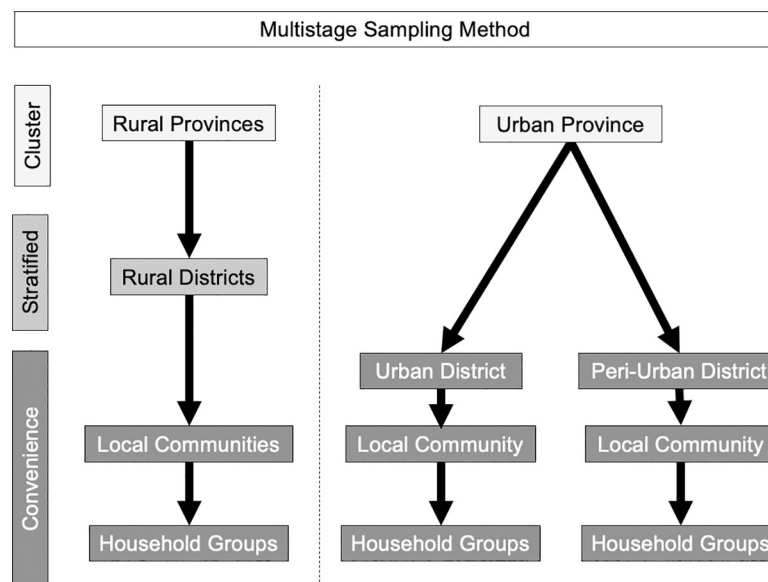

**Fig 1. Sample strategy for household selection in rural, peri-urban and urban study sites of Mongolia.**

<https://doi.org/10.1371/journal.pntd.0009543.g001>

geography (ex. near water or in the mountains). Using a convenience sampling strategy, local guides assisted the field team in transecting the rural community area to look for household groups based on seasonal ger movement. These groups may have one household or multiple households. When a household group was found, all ger households with separate livestock were invited to participate.

Within the urban Tov province, there are 27 *soum* districts and nine municipal districts in and around the nation's capital city, Ulaanbaatar. Ulaanbaatar is home to approximately 1.5 million people, with peri-urban ger settlements growing each year along with the urban poverty rate [26,47]. These informal communities are typically not included in the urban infrastructure of water, sanitation, or household heating [48,49]. Many of these households practice animal husbandry for food and income similar to their rural counterparts [50]. Outside of the capital city, Tov province is primarily forest-steppe or steppe landscape [45,46]. Ulaanbaatar was chosen as a study cluster site with urban sampling in the Bayangol district and peri-urban ger households sampled in the Bayanzurkh district. Urban Bayangol respondents were invited to participate at a community health clinic as access to apartment complexes for recruitment purposes was not possible due to building security. All households, regardless of location, were given compensation for their participation in the form of popular household consumable goods such as noodles, candy, and fresh bread worth no more than \$10 USD. This was selected in consultation with local field staff.

### Sample collection

Each participating household was visited by the research team on two consecutive days. During the first day, Mongolian team members explained the study and obtained informed written consent from an adult household member. A household survey was then administered to this adult by a trained field team member covering topics related to water, sanitation, and hygiene, animal contact, food safety, diarrheal disease, and zoonotic risk perceptions. The survey was initially written in English and translated into Mongolian by local staff (S1 File)

After the survey was completed, a household member was asked to fill a sterile 50mL tube (Falcon 50mL Conical Centrifuge Tubes, Fisher Scientific) with household drinking water and then, following permission, a field team member placed a commercial sticky fly strip ribbon inside the ger near the stove and food prep area. The household was provided with stool containers, gloves, aluminum pans, and instructions for how to safely and correctly collect approximately 5g of stool from up to two household members, to be decided at their discretion [51]. The instructions were written in Mongolian and contained illustrations created by the research team (available by request). Global Positioning System (GPS) data points were recorded for the household using a handheld device (eTrex 10 GPS Navigator, Garmin). Finally, fresh animal stool samples were collected from the ground surrounding the ger from up to five different animal species. Approximately 24 hours later, the ger was revisited and the human stool was gathered and labeled as adult/child and male/female per communication with the household. Adults were considered 18 years or more. Fly strips were examined and up to 20 flies were removed with sterile forceps cleaned with 70% alcohol and air dried between households to prevent cross-contamination [13,52]. Fly pools were placed into a sterile container for each household they were found. Date and time of sample collection were recorded.

For apartment households, the consent and household survey were administered at the community clinic. At the completion of the survey, each participant received a fly strip, human stool containers for households without a toilet or "hats" for toilet stool collection (Standard Speci-Pan, Specimen Collector, Medline), gloves, instructions in Mongolian on safe stool collection for either sanitation method, and animal waste containers if the household

indicated they owned a domestic animal. At an agreed upon pick up time for the following day, participants contacted field staff with verbal directions to a pickup address. GPS points were recorded for the overall apartment or housing complex where the participant lived.

### Sample preparation

All water samples were stored at room temperature or  $-4^{\circ}\text{C}$  until transported to the Institute of Veterinary Medicine (IVM) for processing. Stool samples (human and animal) were stored at room temperature in 70% alcohol until taken to the IVM laboratory for processing [53–56]. Flies were kept at room temperature or euthanized for several hours in a freezer, until they could be stored at the IVM laboratory for identification using a taxonomic guide to the family level of *Muscidae*, *Calliphoridae*, and *Sarcophagidae* and processed for further analysis [57–60].

Before DNA extraction, stool samples first underwent several steps in preparation. Five grams of stool stored in 70% alcohol was transferred into 15mL tubes (Falcon 15mL Conical Centrifuge Tubes, Fisher Scientific). Using a modified technique described by Hong et al., these tubes were then centrifuged at 2,000 rpm for three minutes followed by the removal of the preservative supernatant [40]. Samples were then resuspended by filling the 15mL tube with phosphate buffered saline (1 X PBS). Centrifugation was repeated at 3,000 rpm for five minutes, with the supernatant again decanted. After the initial phase, the resulting pellet was moved into 1.5ml tubes and stored at  $-4^{\circ}\text{C}$  before undergoing the second step.

Fly samples were prepared by adding 5mL of PBS to each 15mL tube containing one fly pool, modified from Clavel et al. [61]. Each tube was then gently rocked (by hand) for two minutes to dislodge oocysts from exterior exoskeleton of the fly [52,62–65]. Next, a disinfected plastic rod (chopstick) was inserted into the 15mL tube to macerate the flies for one minute [13,52,58,60–61,63–66]. Then the 15mL tube of homogenized flies were centrifuged at 2,000 rpm for five minutes [62–63]. The liquid supernatant was poured off and the remaining pellet was placed in a clean 2mL tube before the next round of processing [58,16,67].

Household water samples were centrifuged at 4,000 rpm for 15 minutes with a counter-weight when needed as modified from Shanan et. al. [68]. Liquid was then carefully poured off the top to leave approximately 0.5mL from the bottom of the tube. Using a clean, wooden stick materials from the bottom were resuspended into the remaining liquid. This liquid containing debris was removed with a clean pipette and placed in a new, sterile 2mL tube.

For the next step in processing, the stool, water, and fly samples were placed in a 16 place beaker rack (Beaker Buddy 16 Place, Electron Microscopy Sciences). The secured samples then underwent 15 freeze-thaw cycles wherein the samples were placed in liquid nitrogen for one minute then directly thawed in a water bath of  $65^{\circ}\text{C}$  for one minute to break the thick walls of the *Cryptosporidium* and *Giardia* cysts [69]. The resulting sample was stored at  $-4^{\circ}\text{C}$  until DNA extraction.

### DNA extraction and multiplex real-time PCR

DNA was extracted from human and animal stool samples using TIANamp Stool DNA kits (Tiangen Biotech, Beijing, Cat. No. DP328) and from fly and water samples using TIANamp Genomic DNA kits (Tiangen Biotech, Beijing, Cat. No. DP304) following the manufacturer's instructions. Extracted DNA was then stored at  $-80^{\circ}\text{C}$  until PCR amplification.

Target genes comprised the 18S ribosomal RNA (rRNA) gene for *Giardia duodenalis* and the *Cryptosporidium* Oocyst Wall Protein (COWP) for *Cryptosporidium* spp. [70,71]. Modified amplification reactions were performed with optimized concentrations for primer and probe sequences described in previous studies [70,71]. Amplification consisted of three

minutes at 95°C followed by 40 cycles of 30 seconds at 95°C, 30 seconds at 55°C, and 30 seconds at 72°C then finally 7 minutes at 72°C. Amplification, detection, and data analysis were performed on the iCycler iQ Real-Time Detection System (Bio-Rad, California, USA).

### Data analysis

Statistical analyses were performed using Stata IC 15.0 (StataCorp. 2017, College Station, TX, USA). Descriptive statistics were used to determine the prevalence of pathogens in Mongolian households and samples by province, month, and specimen type. Participants that reported more than one primary source of water or sanitation in the household survey were classified by the least unimproved source indicated. According to the Joint Monitoring Programme for Water Supply, Sanitation and Hygiene (JMP), improved drinking water sources (piped water, boreholes or tubewells, protected springs and dug wells, rainwater that can be collected free of environmental contamination, and bottled or delivered water) are typically safer in terms of their design and construction than unimproved water sources (unprotected springs or dug wells, surface water such as streams and lakes, or rainwater or snow that has been collected after environmental contamination) [72].

Improved sanitation methods safely collect and store waste to avoid human contact and include flushing or pour toilets connected to a sewage system, septic tanks, pit latrines with concrete slabs and ventilated pit latrines, and composting and/or bio-toilets [72]. Unimproved sanitation methods are hanging latrines or pit latrines without concrete slabs, buckets or other containers, and open defecation [72]. Burying stool was considered an improved sanitation method for this study, although its safety is dependent upon where the waste is buried and at what depth.

An unadjusted bivariate logistic regression model tested for significant correlations between the presence of *Cryptosporidium spp.* and/or the presence of *Giardia spp.* in humans, animals, or the environment of participating rural Mongolian residences and variables of interest associated with their household characteristics, animal contact, and water, sanitation and hygiene behaviors. A combined variable was created to represent households that had a single parasite species or both parasite species present, as the exposure pathways for these pathogens are the same. Variables with significance from the bivariate logistic regression model were included in a multivariate regression model, which also adjusted for household location (ex. rural). Results with  $p \leq 0.05$  were considered statistically significant. Analyses were conducted using only available data and absent data were assumed to be missing at random.

Geospatial operations were conducted using ArcGIS 10.5.1 (ESRI, Redlands, CA) and R 3.6.1 ([www.r-project.org](http://www.r-project.org)) on all study households with successfully recorded GPS points ( $n = 245$ ). The aim of our geospatial analysis was to identify regional variability in the risk of parasitized human households while controlling for the presence of parasites in water, flies, and animal specimens, regardless of pathogen.

To perform these analyses we constructed a Bayesian spatial regression model using the R package *brms*, which makes use of the posterior sampling program Stan [73–74]. Our dependent variable was the binary result of parasite presence in a household member, regardless of parasite type. This was modeled using a logistic probability distribution, with the primary independent variable being a 2-dimensional smoothing function of longitude/latitude coordinate space. We used a Gaussian process (kriging) to create a smooth function of coordinate space. Animal, fly, and water testing were incorporated in the models as fixed linear predictors. We chose minimally informative regularizing prior probability distributions for the linear predictors and the intercept, selecting a mean of 0 and standard deviation of 0.5 to constrain the model from making extreme estimates. To assess the impact of animal, fly, and water

contamination, we also ran a model adjusted only for spatial coordinates. We then compared the adjusted and unadjusted models by their Watanabe-Akaike information criterion (WAIC).

After running the model, we predicted its results to the geographic regions surrounding our sampling households. The households loosely fell within five clusters, and these clusters were separated by large areas with no sampling (and sparse populations). Using the minimum bounding geometry tool in ArcGIS we created a convex boundary around each of the five clusters, then expanded each of these boundaries using a 10 km buffer zone. We then generated a dense coordinate grid covering the entire study area and retained those coordinate pairs that fell within the buffer zones. We then predicted the odds estimates from the fit spatial model to the remaining coordinates. Odds were converted to probability using the formula  $\text{odds} / (1 + \text{odds})$ , and expressed as predicted prevalence.

## Results

A total of 250 households participated from rural, peri-urban, and urban sites. Overall, 20% of study households had at least one sample that was positive for *Cryptosporidium spp.* and/or *Giardia duodenalis* ( $n = 51$ ; Table 1). Household samples included human stool, domestic animal stool, drinking water, and filth fly pools. Poly-parasitism occurred in 0.7% of the overall samples tested, while 0.8% of samples were positive for *Cryptosporidium spp.* only and 3.5% positive for *Giardia duodenalis* only. Of the 51 positive households, 19% demonstrated poly-parasitism and approximately 8% had one or more ZEPs found in both human and animal samples at the same home site (Fig 2).

Most positive households were in the rural provinces of Zavkhan (28%) and Selenge (26%). Rural sites also provided more samples per household as compared to the peri-urban and urban sites as they engaged in herding and other animal husbandry operations. Overall prevalence varied by province, with 7% of all Selenge household samples testing positive for *Cryptosporidium spp.* and/or *Giardia duodenalis*.

Parasite prevalence among the household samples was most commonly detected during the warmer months, particularly in August, wherein 11.5% of the collected household samples were positive. All types of household members, regardless of age or sex, were represented among the positive human stool samples provided by the study households. However, the highest parasite prevalence was discovered in female children (8.2%). Among households with either *Cryptosporidium spp.* and/or *Giardia duodenalis*, 19.6% had at least one positive sample occur in an adult female.

The overall prevalence among all domestic animal stool samples was 3.3%. The animal species with the highest zoonotic enteric prevalence was horses (8.3%), followed by dogs (3.2%), and finally sheep/goats (2.7%). Of the positive households, 15.7% demonstrated *Giardia duodenalis* or poly-parasitism with *Cryptosporidium spp.* in a horse. Drinking water samples from five study households were positive for *Cryptosporidium spp.* only (2%). Of the filth flies that were available to be collected and pooled in households, 14.8% were positive for one or both parasite species. Among households with any positive sample, 33.3% had a fly pool with *Giardia duodenalis* or poly-parasitism with *Cryptosporidium spp.*

The presence of *Cryptosporidium spp.* and/or *Giardia duodenalis* was highest in rural households (25%) as compared to urban and peri-urban households (both 14%; Table 2). Parasite prevalence was more common among households that did not have electricity but instead relied on solar power (25%), as well as households that utilized wood and biofuel (i.e. animal dung) for their main fuel source (25%). This was also the case for households that reported use of animal manure or compost for additional purposes (25%).

Regardless of parasite presence, most households reported owning a mobile phone (97%), television (85%) and having access to a bank account (96%). Among the households in which



**Table 1. Occurrence of *Cryptosporidium spp.* and *Giardia duodenalis* in human, animal, water, and fly samples (n = 1,354) collected at Mongolian study households (n = 250).**

| Variable                  | Study households<br>n | Total positive households<br>n (%) | Samples<br>n | Number of positive samples n |                               |                                      | Total positive samples<br>n (%) |
|---------------------------|-----------------------|------------------------------------|--------------|------------------------------|-------------------------------|--------------------------------------|---------------------------------|
|                           |                       |                                    |              | <i>Crypto<br/>spp.</i>       | <i>Giardia<br/>duodenalis</i> | <i>Crypto spp. &amp;<br/>Giardia</i> |                                 |
| <b>Total Households</b>   |                       |                                    |              |                              |                               |                                      |                                 |
| Households                | 250                   | 51 (20.4)                          | 1,354        | 11                           | 47                            | 10                                   | 68 (5.0)                        |
| <b>Household Location</b> |                       |                                    |              |                              |                               |                                      |                                 |
| Selenge                   | 50                    | 13 (26.0)                          | 347          | 1                            | 15                            | 9                                    | 25 (7.2)                        |
| Zavkhan                   | 50                    | 14 (28.0)                          | 359          | 3                            | 16                            | 0                                    | 19 (5.3)                        |
| Dundgobi                  | 50                    | 10 (20.0)                          | 330          | 1                            | 8                             | 1                                    | 10 (3.0)                        |
| Peri-Urban<br>Ulaanbaatar | 50                    | 7 (14.0)                           | 189          | 1                            | 6                             | 0                                    | 7 (3.7)                         |
| Ulaanbaatar City          | 50                    | 7 (14.0)                           | 129          | 5                            | 2                             | 0                                    | 7 (5.4)                         |
| <b>Sampling Month</b>     |                       |                                    |              |                              |                               |                                      |                                 |
| April                     | 25                    | 3 (12.0)                           | 165          | 0                            | 1                             | 3                                    | 4 (2.4)                         |
| May                       | 25                    | 7 (28.0)                           | 184          | 0                            | 11                            | 0                                    | 11 (6.0)                        |
| June                      | 50                    | 9 (18.0)                           | 273          | 1                            | 8                             | 0                                    | 9 (3.3)                         |
| August                    | 25                    | 10 (40.0)                          | 182          | 1                            | 14                            | 6                                    | 21 (11.5)                       |
| September                 | 50                    | 13 (26.0)                          | 340          | 3                            | 10                            | 1                                    | 14 (4.1)                        |
| October                   | 75                    | 9 (12.0)                           | 210          | 6                            | 3                             | 0                                    | 9 (4.3)                         |
| <b>Household Member</b>   |                       |                                    | 419          |                              |                               |                                      | 27 (6.4)                        |
| Adult Female              |                       | 10 (19.6)                          | 153          | 4                            | 4                             | 2                                    | 10 (6.5)                        |
| Adult Male                |                       | 7 (13.7)                           | 103          | 0                            | 5                             | 2                                    | 7 (6.8)                         |
| Child Female              |                       | 6 (11.8)                           | 73           | 0                            | 4                             | 2                                    | 6 (8.2)                         |
| Child Male                |                       | 4 (7.8)                            | 89           | 2                            | 1                             | 1                                    | 4 (4.5)                         |
| <b>Domestic Animal</b>    |                       |                                    | 570          |                              |                               |                                      | 19 (3.3)                        |
| Sheep/Goat                | 226                   | 6 (11.8)                           | 226          | 0                            | 6                             | 0                                    | 6 (2.7)                         |
| Cow                       | 130                   | 2 (3.9)                            | 130          | 0                            | 1                             | 0                                    | 1 (0.8)                         |
| Horse                     | 108                   | 8 (15.7)                           | 108          | 0                            | 8                             | 1                                    | 9 (8.3)                         |
| Dog                       | 94                    | 3 (5.9)                            | 94           | 0                            | 2                             | 1                                    | 3 (3.2)                         |
| Other**                   | 11                    | 0                                  | 11           | 0                            | 0                             | 0                                    | 0 (0)                           |
| Camel                     | 1                     | 0                                  | 1            | 0                            | 0                             | 0                                    | 0 (0)                           |
| Cat                       | 0                     | 0                                  | 0            | 0                            | 0                             | 0                                    | 0 (0)                           |
| <b>Drinking Water</b>     | 250                   | 5 (9.8)                            | 250          | 5                            | 0                             | 0                                    | 5 (2.0)                         |
| <b>Fly Pools***</b>       | 115                   | 17 (33.3)                          | 115          | 0                            | 16                            | 1                                    | 17 (14.8)                       |

\*When more than one parasite was present in the same samples, the sample was reported to have both *Crypto. spp.* and *Giardia duodenalis*

\*\*Other samples collected at the household included rodent, yak, and marmot

\*\*\*Fly families in pools included Muscidae, Calliphoridae, and Sarcophagidae.

<https://doi.org/10.1371/journal.pntd.0009543.t001>

one or more zoonotic enteric parasites were found, 23% owned domestic animals or domestic animals were present at the site during sampling. Of the households that tested positive, a range of animal species were owned or present, such as dog (24%), horse (26%), sheep (24%), goat (23%), and cow (23%). When asked about zoonotic or reverse zoonotic disease transmission, most survey respondents said that animals can give illness to humans (83%) but less believed humans can give illness to animals (8%). Among the households with parasite presence, only 22% of survey respondents recognized the risk of zoonotic disease transmission.

In total, 36% of the study households (n = 91) reported using an improved source for their primary drinking water, as defined by the WHO/UNICEF Joint Monitoring Programme for

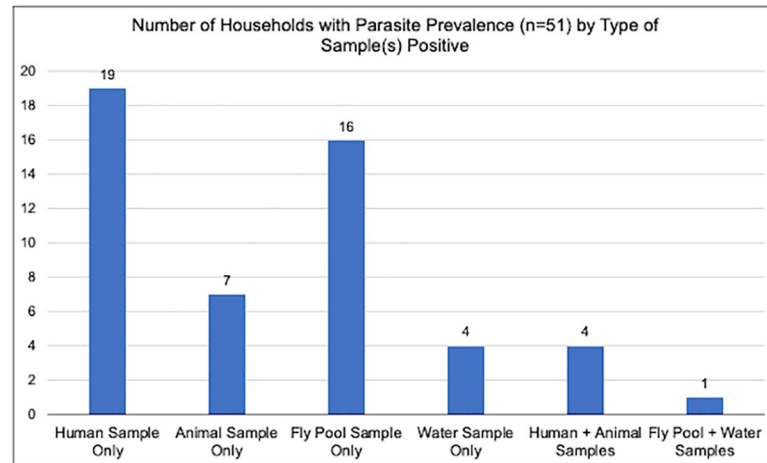

**Fig 2. Sample types positive for *Cryptosporidium* spp. and/or *Giardia duodenalis* at each Mongolian household with zoonotic enteric parasite presence.**

<https://doi.org/10.1371/journal.pntd.0009543.g002>

Water Supply, Sanitation and Hygiene (JMP) (Table 3) [72]. However, only 28% of the rural households had access to an improved drinking water source. Of households that used unimproved water sources, 43% were positive for one or both parasites. Boiling water before consumption was the common method for drinking water treatment. Still, 92% of the households with parasite presence reported to boil their water before drinking it.

Most rural households reported their drinking water primarily came from an unimproved source (43%), such as directly obtaining the water from lakes, rivers or streams (33%) or from melting snow (11%). In some situations, melted snow can be an improved method for procuring safe drinking water. However, observational analysis found the snow surrounding rural households to be contaminated by livestock and human waste without a catchment system in place to keep the snow separated from environmental pollutants.

Overall, 40% of the study households used an improved sanitation source, again as those outlined by the WHO/UNICEF JMP [72]. Yet within the rural households, 70% used unimproved sources of sanitation management, including 49% of rural households who reported practicing open defecation. Of the study households that reported unimproved sanitation services, 61% were positive for one or more zoonotic enteric parasites.

Sink and/or handwashing site availability varied across rural (38%), peri-urban (82%), and urban study households (100%). Of those households that reported having a designated spot for washing hands, 67% were located inside. Yet, of the rural households with handwashing sites, 66% were located outside. Popular self-reported handwashing events of the study households included in the morning (88%), after handling animals (54%), before cooking (46%), before eating (44%), and after urination/defecation (42%).

An analysis of the risk factors identified by the household survey are presented (Table 4). In the bivariate logistic regression model, there were greater odds of parasite presence when a household owned domestic animals (OR 2.40; CI 1.02–5.65;  $p = 0.05$ ) or was located in a rural area (OR 0.50; CI 0.25–0.98;  $p = 0.04$ ). But the odds of parasite presence were lower when the household used of an improved drinking water source (OR 0.27; CI 0.12–0.61;  $p = < 0.01$ ) or had an indoor handwashing site (OR 0.41; CI 0.19–0.92;  $p = 0.03$ ). Use of improved sanitation methods and practicing open defecation were not associated with household zoonotic parasite presence. In the multivariate model, household use of an improved drinking water source was the only factor that remained statistically significant in relation to *Cryptosporidium* spp. and/or

Table 2. Characteristics of Mongolian Households with Zoonotic Enteric Parasite Presence (n = 51) and Without (n = 199).

| Household Characteristic                      | Households without Parasite Presence<br>n(%) | Households with Parasite* Presence<br>n(%) | Total Households<br>n |
|-----------------------------------------------|----------------------------------------------|--------------------------------------------|-----------------------|
| All Households                                | 199 (79.6)                                   | 51 (20.4)                                  | 250                   |
| Location                                      |                                              |                                            |                       |
| Urban                                         | 43 (86)                                      | 7 (14)                                     | 50                    |
| Peri-Urban                                    | 43 (86)                                      | 7 (14)                                     | 50                    |
| Rural                                         | 113 (75.3)                                   | 37(24.7)                                   | 150                   |
| Number of Residents                           |                                              |                                            |                       |
| 1–2                                           | 35 (85.4)                                    | 6 (14.6)                                   | 41                    |
| 3–5                                           | 116 (77.9)                                   | 33 (22.1)                                  | 149                   |
| 6–8                                           | 44 (80)                                      | 11 (20)                                    | 55                    |
| >8                                            | 4 (80)                                       | 1 (20)                                     | 5                     |
| Children ≥ 5 Years                            |                                              |                                            |                       |
| Yes                                           | 69 (84.2)                                    | 13 (15.8)                                  | 82                    |
| No                                            | 130 (77.4)                                   | 38 (22.6)                                  | 168                   |
| Electricity (n = 249)                         |                                              |                                            |                       |
| Yes                                           | 85 (85.9)                                    | 14 (14.1)                                  | 99                    |
| No                                            | 113 (75.3)                                   | 37 (24.7)                                  | 150                   |
| Solar Power (n = 249)                         |                                              |                                            |                       |
| Yes                                           | 110 (74.8)                                   | 37 (25.2)                                  | 147                   |
| No                                            | 88 (86.3)                                    | 14 (13.7)                                  | 102                   |
| Main Fuel Source (n = 249)                    |                                              |                                            |                       |
| Electricity                                   | 68 (87.2)                                    | 10 (12.8)                                  | 78                    |
| Propane                                       | 6 (100)                                      | 0 (0)                                      | 6                     |
| Wood/Biofuel                                  | 119 (74.8)                                   | 40 (25.2)                                  | 159                   |
| Coal                                          | 5 (83.3)                                     | 1 (16.7)                                   | 6                     |
| Use Compost/Manure (n = 184)                  |                                              |                                            |                       |
| Yes                                           | 117 (75.5)                                   | 38 (24.5)                                  | 155                   |
| No                                            | 26 (89.7)                                    | 3 (10.3)                                   | 29                    |
| Own the Following Assets                      |                                              |                                            |                       |
| Refrigerator (n = 249)                        | 73 (79.4)                                    | 19 (20.6)                                  | 92                    |
| Tractor (n = 249)                             | 0 (0)                                        | 2 (100)                                    | 2                     |
| Animal-Drawn Cart (n = 249)                   | 1 (20)                                       | 4 (80)                                     | 5                     |
| Car/Truck                                     | 104 (80)                                     | 26 (20)                                    | 130                   |
| Motorcycle                                    | 83 (78.3)                                    | 23 (21.7)                                  | 106                   |
| Bicycle                                       | 7 (77.8)                                     | 2 (22.2)                                   | 9                     |
| Radio                                         | 26 (89.7)                                    | 3 (10.3)                                   | 29                    |
| Mobile Phone                                  | 192 (79)                                     | 51 (21)                                    | 243                   |
| Computer                                      | 35 (85.4)                                    | 6 (14.6)                                   | 41                    |
| Television                                    | 170 (79.8)                                   | 43 (20.2)                                  | 213                   |
| Bank Account                                  | 190 (78.8)                                   | 51 (21.2)                                  | 241                   |
| Domestic Animal Presence/Ownership            |                                              |                                            |                       |
| Yes                                           | 144 (76.6)                                   | 44 (23.4)                                  | 188                   |
| No                                            | 55 (88.7)                                    | 7 (11.3)                                   | 62                    |
| Presence/Ownership of the Following Animal(s) |                                              |                                            |                       |
| Dog                                           | 127 (76.1)                                   | 40 (23.9)                                  | 167                   |
| Cat                                           | 15 (75)                                      | 5 (25)                                     | 20                    |
| Horse                                         | 101 (74.3)                                   | 35 (25.7)                                  | 136                   |

(Continued)

Table 2. (Continued)

| Household Characteristic                                                | Households without Parasite Presence<br>n(%) | Households with Parasite* Presence<br>n(%) | Total Households<br>n |
|-------------------------------------------------------------------------|----------------------------------------------|--------------------------------------------|-----------------------|
| Sheep                                                                   | 113 (75.8)                                   | 36 (24.2)                                  | 149                   |
| Goat                                                                    | 114 (77)                                     | 34 (23)                                    | 148                   |
| Camel                                                                   | 3 (75)                                       | 1 (25)                                     | 4                     |
| Cow                                                                     | 105 (76.6)                                   | 32 (23.4)                                  | 137                   |
| Chicken                                                                 | 1 (100)                                      | 0                                          | 1                     |
| Other animal(s) Not Listed                                              | 28 (77.8)                                    | 8 (22.2)                                   | 36                    |
| Think <b>Humans</b> Can Give Disease or Illness to Animals<br>(n = 249) |                                              |                                            |                       |
| Yes                                                                     | 18 (85.7)                                    | 3 (14.3)                                   | 21                    |
| No                                                                      | 117 (81.8)                                   | 26 (18.2)                                  | 143                   |
| Unsure/Don't Know                                                       | 63 (74.1)                                    | 22 (25.9)                                  | 85                    |
| Think <b>Animals</b> Can Give Disease or Illness to Humans              |                                              |                                            |                       |
| Yes                                                                     | 162 (78.3)                                   | 45 (21.7)                                  | 207                   |
| No                                                                      | 18 (85.7)                                    | 3 (14.3)                                   | 21                    |
| Unsure/Don't Know                                                       | 19 (86.4)                                    | 3 (13.6)                                   | 22                    |

\*Positive for *Cryptosporidium spp.*, *Giardia duodenalis*, or both zoonotic enteric parasites

<https://doi.org/10.1371/journal.pntd.0009543.t002>

*Giardia duodenalis* presence (OR 0.16; CI 0.04–0.68;  $p = 0.01$ ). The addition of more explanatory variables in the multivariate model likely contributed to variance in the dependent variable and may have reduced statistical contribution of the previously significant variables from the bivariate model.

The prevalence of human parasitosis was heterogeneous among our sampling sites within Mongolia, with a greater prevalence in more northern sites (Fig 3). The odds ranged from 0.015 in Dundgobi province to 0.14 in Selenge province. This heterogeneity was not attenuated by adjustment for environmental parasite exposure, suggesting that other unmeasured factors may contribute to this geographic pattern.

## Discussion

Our findings in this One Health study on the presence of zoonotic enteric parasites and associated risk factors demonstrate *Cryptosporidium spp.* and *Giardia duodenalis* circulating among people, animals, flies, and drinking water within Mongolia, particularly for rural herding families. Fifty-one households had at least one sample type test positive for a ZEP, several of which either had polyparasitism, positivity among multiple sample types, or both at the same home site. This study demonstrates the importance of addressing the simultaneous presence of zoonotic enteric parasites among humans, animals, and their shared environment.

Inequitable access to improved water, sanitation, and hygiene (WASH) infrastructure was highlighted between our participating urban, peri-urban, and rural Mongolian households. Within our study population, households that use an improved drinking water source were less likely to have a positive zoonotic enteric parasite sample than households without drinking water from an improved source (OR 0.27). In an analysis of outbreaks associated with the waterborne parasites *Cryptosporidium spp.* and *Giardia duodenalis*, researchers found that in 82% of the global outbreaks between 2011–2016, risk factors included untreated drinking water, contaminated water sources, ineffective treatment of water, or contamination during storage or at point-of-use [3]. Obtaining water from a source that has been designated as

**Table 3. Water, Sanitation and Hygiene Access and Behaviors at Rural (n = 150), Peri-Urban (n = 50), and Urban (n = 50) Mongolian Study Households and Households with Zoonotic Enteric Parasite Prevalence (n = 51).**

| WASH Factor                               | Households |                 |            |                         | Total N |
|-------------------------------------------|------------|-----------------|------------|-------------------------|---------|
|                                           | Rural n(%) | Peri-Urban n(%) | Urban n(%) | Parasite* Presence n(%) |         |
| <b>Main Drinking Water Source</b>         |            |                 |            |                         |         |
| Improved                                  | 42 (28.0)  | 46 (92.0)       | 3 (6.0)    | 11 (21.6)               | 91      |
| Private Well                              | 2 (1.3)    | 6 (12.0)        | 0 (0)      | 3 (5.9)                 | 8       |
| Shared Well**                             | 2 (1.3)    | 0 (0)           | 0 (0)      | 2 (3.9)                 | 2       |
| Soum Center Well**                        | 17 (11.3)  | 0 (0)           | 0 (0)      | 0 (0)                   | 17      |
| Piped Water                               | 21 (14.0)  | 23 (46.0)       | 0 (0)      | 4 (7.8)                 | 44      |
| Tanker Truck                              | 0 (0)      | 17 (34.0)       | 0 (0)      | 2 (3.9)                 | 17      |
| Rainwater                                 | 0 (0)      | 0 (0)           | 0 (0)      | 0 (0)                   | 0       |
| Bottled Water                             | 0 (0)      | 0 (0)           | 3 (6.0)    | 0 (0)                   | 3       |
| Unimproved                                | 65 (43.3)  | 0 (0)           | 0 (0)      | 22 (43.1)               | 65      |
| Lake, River or Stream                     | 49 (32.7)  | 0 (0)           | 0 (0)      | 17 (33.3)               | 49      |
| Melted Snow***                            | 16 (10.7)  | 0 (0)           | 0 (0)      | 5 (9.8)                 | 16      |
| Other/Source Not Listed                   | 43 (28.7)  | 4 (8.0)         | 47 (94.0)  | 18 (35.3)               | 94      |
| <b>Water Treatment Before Use</b>         |            |                 |            |                         |         |
| Boil It                                   | 123 (82.0) | 45 (90.0)       | 47 (94.0)  | 47 (92.2)               | 215     |
| Filter It                                 | 3 (2.0)    | 0 (0)           | 3 (6.0)    | 0 (0)                   | 6       |
| Drink Directly From Source                | 24 (16.0)  | 5 (10.0)        | 0 (0)      | 4 (7.8)                 | 29      |
| <b>Main Sanitation Source</b>             |            |                 |            |                         |         |
| Improved                                  | 44 (29.3)  | 8 (16.0)        | 49 (98.0)  | 20 (39.2)               | 101     |
| Flush Toilet                              | 0 (0)      | 3 (6.0)         | 49 (98.0)  | 7 (13.7)                | 52      |
| Pit Latrine with Slab                     | 0 (0)      | 1 (2.0)         | 0 (0)      | 0 (0)                   | 1       |
| Bury in Hole                              | 44 (29.3)  | 3 (6.0)         | 0 (0)      | 13 (25.5)               | 47      |
| Compost or Biotoilet                      | 0 (0)      | 1 (2.0)         | 0 (0)      | 0 (0)                   | 1       |
| Unimproved                                | 105 (70.0) | 41 (82.0)       | 0 (0)      | 31 (60.8)               | 146     |
| Pit Latrine No Slab                       | 31 (20.7)  | 40 (80.0)       | 0 (0)      | 13 (25.5)               | 71      |
| Bucket or Container                       | 0 (0)      | 0 (0)           | 0 (0)      | 0 (0)                   | 0       |
| Open Defecation                           | 74 (49.3)  | 1 (2.0)         | 0 (0)      | 18 (35.3)               | 75      |
| Other/Sanitation Not Listed               | 1 (0.7)    | 1 (2.0)         | 1 (2.0)    | 0 (0)                   | 3       |
| <b>Sink or Handwashing Area (n = 249)</b> |            |                 |            |                         |         |
| Yes                                       | 56 (37.6)  | 41 (82.0)       | 50 (100)   | 33 (64.7)               | 147     |
| No                                        | 93 (62.4)  | 9 (18.0)        | 0 (0)      | 18 (35.3)               | 102     |
| <b>If Yes, Location (n = 147)</b>         |            |                 |            |                         |         |
| Inside                                    | 19 (33.9)  | 30 (73.1)       | 50 (100)   | 17 (51.5)               | 99      |
| Outside                                   | 37 (66.1)  | 11 (26.8)       | 0 (0)      | 16 (48.5)               | 48      |
| <b>Handwashing Events</b>                 |            |                 |            |                         |         |
| In the Morning                            | 140 (93.3) | 39 (78.0)       | 41 (82.0)  | 45 (88.2)               | 220     |
| Before Cooking                            | 57 (38.0)  | 26 (52.0)       | 32 (64.0)  | 27 (52.9)               | 115     |
| Before Eating                             | 53 (35.3)  | 17 (34.0)       | 40 (80.0)  | 17 (33.3)               | 110     |
| After Urination or Defecation             | 35 (23.3)  | 26 (52.0)       | 44 (88.0)  | 26 (51.0)               | 105     |
| After Handling Animals                    | 117 (78.0) | 16 (32.0)       | 3 (6.0)    | 33 (64.7)               | 136     |
| Other Times Not Listed                    | 35 (23.3)  | 13 (26.0)       | 18 (36.0)  | 14 (27.5)               | 66      |
| Never Wash Hands                          | 0 (0)      | 0 (0)           | 0 (0)      | 0 (0)                   | 0       |

\*Positive for *Cryptosporidium spp.*, *Giardia duodenalis*, or both zoonotic enteric parasites

\*\*Many respondents wrote in that they used a shared public water well located in the center of each rural soum

\*\*\*Melted snow can be classified as an improved drinking water source if the collected snow has remained free of environmental contamination such as human or animal waste

<https://doi.org/10.1371/journal.pntd.0009543.t003>

**Table 4. Bivariate and multivariate analysis of the association between household risk factors and the presence of *Cryptosporidium spp.* and/or *Giardia duodenalis* in humans, animals, and the environment.**

| Variable                                  | Unadj. Bivariate Regression |           |                    | Adj. Multivariate Regression |           |                   |
|-------------------------------------------|-----------------------------|-----------|--------------------|------------------------------|-----------|-------------------|
|                                           | OR (95% CI)                 | Std. Err. | P value            | aOR (95% CI)                 | Std. Err. | P value           |
| <b>Household Drinking Water</b>           |                             |           |                    |                              |           |                   |
| Use Improved Water Source                 | 0.27 (0.12–0.61)            | 0.11      | <0.01 <sup>b</sup> | 0.16 (0.04–0.68)             | 0.12      | 0.01 <sup>c</sup> |
| Water Treatment <sup>a</sup> Prior to Use | 1.69 (0.56–5.09)            | 0.95      | 0.35               |                              |           |                   |
| <b>Hygiene Behaviors</b>                  |                             |           |                    |                              |           |                   |
| Sink or Hand Washing Site                 | 1.35 (0.71–2.56)            | 0.44      | 0.36               |                              |           |                   |
| Site is indoors                           | 0.41 (0.19–0.92)            | 0.17      | 0.03 <sup>b</sup>  | 1.12 (0.38–3.30)             | 0.62      | 0.83              |
| Reported Hand Washing                     |                             |           |                    |                              |           |                   |
| In the Morning                            | 1.03 (0.40–2.67)            | 0.50      | 0.95               |                              |           |                   |
| Before Cooking                            | 1.42 (0.77–2.63)            | 0.45      | 0.27               |                              |           |                   |
| Before Eating                             | 0.57 (0.30–1.09)            | 0.19      | 0.09               |                              |           |                   |
| Before Feeding Child                      | 0.72 (0.24–2.20)            | 0.41      | 0.57               |                              |           |                   |
| After Using Bathroom                      | 1.58 (0.85–2.93)            | 0.50      | 0.15               |                              |           |                   |
| After Handling Animals                    | 1.71 (0.90–3.23)            | 0.56      | 0.10               |                              |           |                   |
| Use Compost/Animal Manure                 | 2.81 (0.81–9.82)            | 1.79      | 0.11               |                              |           |                   |
| <b>Household Sanitation</b>               |                             |           |                    |                              |           |                   |
| Use Improved Sanitation                   | 0.92 (0.49–1.72)            | 0.30      | 0.79               |                              |           |                   |
| Reported Open Defecation                  | 1.21 (0.62–2.36)            | 0.41      | 0.58               |                              |           |                   |
| <b>Animal Factors</b>                     |                             |           |                    |                              |           |                   |
| Household Animal Contact                  | 1.87 (0.87–4.04)            | 0.73      | 0.11               |                              |           |                   |
| Household Animal Ownership                | 2.40 (1.02–5.65)            | 1.05      | 0.05 <sup>b</sup>  | 2.73 (0.74–10.05)            | 1.82      | 0.13              |
| <b>Location</b>                           |                             |           |                    |                              |           |                   |
| Rural Site                                | 0.50 (0.25–0.98)            | 0.17      | 0.04 <sup>b</sup>  | 0.87 (0.25–3.09)             | 0.56      | 0.83              |

<sup>a</sup>Treat drinking water by boiling or filtering

<sup>b</sup>Significant at  $p \leq 0.05$  in the bivariate analysis

<sup>c</sup>Significant at  $p \leq 0.05$  in the multivariate analysis.

<https://doi.org/10.1371/journal.pntd.0009543.t004>

“improved” does not ensure drinking water safety at the time of use. Several opportunities exist for the introduction of waterborne parasites between a drinking water collection source and the point-of-use [75]. These include fecal contamination of water storage containers, utensils or hands used to divvy out water through human waste, animal waste, or contact with insect or rodent vectors [76,77]. In our study population the majority of participants (88%) indicated that they used some form of water treatment before use but still five drinking water samples were positive for *Cryptosporidium spp.* Access to an indoor handwashing site or sink was also a protective factor against parasite prevalence without our study households. Yet this may be an indicator of a household’s socio-economic status or education level. Reliable, available, affordable, and safe water is not only vital for drinking and cooking but is necessary for proper hand hygiene that has been shown to reduce diarrheal disease globally [78]. National efforts towards sustainable and safe water solutions should be a public health priority, with particular attention paid to creating accessible source locations for nomadic herding households and mechanisms and education for storing drinking water cautiously inside the home.

Sanitation within urban households was almost exclusively flush toilets while peri-urban households were typically not supported by municipal waste systems and relied upon unimproved options that do not safely treat or dispose of effluent before it reaches the nearby environment. Rural households also largely utilized unimproved sanitation services with almost

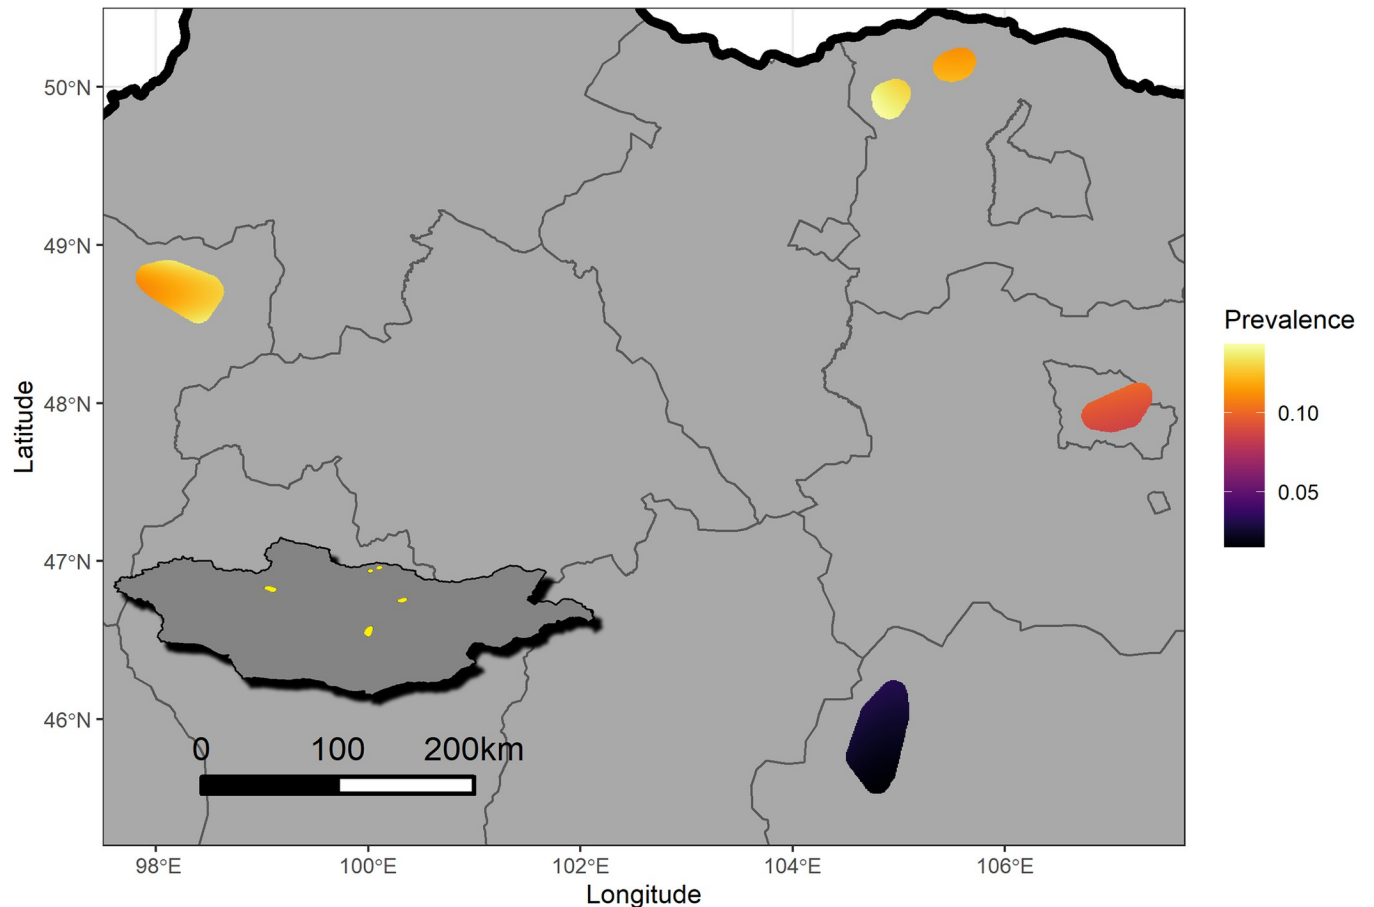

**Fig 3. Predicted prevalence that a participating household would have a household member positive for *Cryptosporidium spp.* and/or *Giardia duodenalis*.** The probability of a positive specimen was modeled as a function of coordinate location and the results of animal, fly, and water testing. The fit model was then predicted to a dense grid of coordinate locations in the environs of the sampling sites. The model revealed spatial heterogeneity, with lower prevalence of the two pathogens in the southernmost cluster of samples. Adjustment for nonhuman samples did not blunt the spatial heterogeneity.

<https://doi.org/10.1371/journal.pntd.0009543.g003>

half practicing open defecation. Open defecation and unmanaged human waste has been shown to lead to pollution of neighboring water sources and facilitate disease spread to humans and animals [77,79]. The proliferation of waste from humans can facilitate reverse zoonotic transmission of parasites to free-roaming animals who graze in the area [80,81]. However, the human and animal movement associated with nomadic and semi-nomadic herding may help reduce the feces burden surrounding a home site, which could help protect against prolonged ZEP exposure risks [82].

Still, indiscriminate feces from humans and animals are the feeding grounds for many filth fly species that can harbor and transmit *Cryptosporidium spp.*, *Giardia duodenalis*, and other diarrheal pathogens [52,83]. After landing or feeding on contaminated excreta or food items, parasite oocysts can be transmitted by intermediate filth fly vectors mechanically on the hairs of their legs or inside their gastrointestinal tracts following ZEP ingestion [58]. Filth fly species, such as the house fly (*Musca domestica*), have been shown to travel distances of up to seven kilometers by flight alone and up to 20 kilometers if utilizing transportation such as a car, boat, or animal [84,85]. Findings from this study indicate that filth flies are important vectors of *Giardia duodenalis* and *Cryptosporidium spp.*, within Mongolian living spaces.

The majority of households with a positive sample were herders who are located in pastoral provinces. This study found that living at a rural site and animal ownership were both associated risk factors for the presence of *Cryptosporidium spp.* and/or *Giardia duodenalis* at a household. However, this association disappeared in the larger multivariate analysis. Mongolian herders and pastoralists have frequent animal contact and utilize animal products for sustenance, building materials, cooking fuel, transportation, protection, clothing, and traditional healing and folklore remedies [33,86]. The type of animal contact rural household members engage may depend upon their sex and/or their age [87]. Within this study population, many tasks related to animal husbandry and livestock care were shared between male and female household members, with certain activities such as slaughtering and butchering predominantly male chores while cooking and milking animals were female chores [35]. Because of this, transmission routes for zoonotic enteric parasite exposures will vary among household members and should be addressed through unique interventions that take these differences into consideration. For example, access to dedicated handwashing sites inside homes may help to reduce foodborne transmission as women can wash their hands after chores, such as milking, prior to meal preparation or child feeding.

Animal contact and movement across steppe pastures in Mongolia are both seasonal activities. Spring calving and lambing, summer horse racing events and festivals such as Naadaam, fall culling practices, and winter illnesses and starvation trials present distinctive risk factors for zoonotic and reverse zoonotic disease transmission [32,35,87,88]. Furthermore, harsh temperatures and weather events such as summer droughts and winter *dzuds* can force herders to move livestock and family gers to new ground and in search of shared food and water sources [88]. Research on temporal and seasonal patterns of diarrheal disease has shown summer months to be more prevalent for cases of zoonotic enteric parasites such as cryptosporidiosis, with rates rising with increased temperature and precipitation but also with seasonal exposure risks due to water access and quality and animal and agricultural patterns [89]. In this study, most of the households with parasite presence were sampled in August and September, two of the warmer months of the year in Mongolia. Although the winter months present some of the coldest temperatures felt across the globe with January temperatures ranging from -15°C to -35°C (or 5°F to -31°F), previous research on the viability of infectious *Cryptosporidium spp.* and/or *Giardia duodenalis* oocysts in environmental water samples have demonstrated the potential for viability and infection capabilities at spring melt if the water does not incur freeze-thaw cycles [90,91]. However, the resiliency of parasites decreases as temperatures become more extreme and it is likely that new cases in the warmer months are caused by exposure to animals and humans and not overwintering parasites in water sources [17,91].

Mongolian livestock herds are often devised of horse, cattle, yak, sheep, goats, camels, and in the northern region of the country, reindeer. Animal contact and the purpose of their presence and/or ownership vary by species. For example, dogs are common at rural herding households and within larger peri-urban housing compounds (*khashaas*). They are used for guarding the property or livestock herds, to assist with hunting, and for companionship [37,92]. Each species of animal will utilize their environment in different ways such that their own risk of zoonotic enteric parasites from contaminated water, soil, animal and human waste, flies, and food products may present along distinct exposure pathways, although shared pathways are common and could be increased in highly contaminated spaces. Within the current study, the highest number of samples came from sheep and goats, however the largest parasite prevalence was found in horse samples (8.3%). This is much higher than a study on grazing horses in China which found a positive rates of 2.7% for *Cryptosporidium spp.* and 1.5% for *Giardia duodenalis* [93]. Further research into the mechanisms by which Mongolian



horses become infected with *Cryptosporidium spp.* and/or *Giardia duodenalis*, whether it be through environmental, animal, or human exposure, is warranted to both protect the health of the herds as well as their herders.

This study demonstrates that *Cryptosporidium spp.* and/or *Giardia duodenalis* are circulating at Mongolian households across multiple human and animal hosts, environmental reservoirs of flies and water, and in significant relation to risk factors such as source of drinking water, animal ownership, and rural residence. At several sites, parasite presence was found in multiple sample types suggesting transmission is occurring at the household level. However, our model illustrated spatial variability in the probability that a household would have human parasite presence, even after adjusting for parasite presence in animals, drinking water, or flies. Furthermore, the direction of transmission could not be determined in this study. One limitation of this research was that *Cryptosporidium* genotyping was not done and therefore we cannot present the most popular host species associated with each positive sample. There was no distinction between active infection or those who may be asymptomatic carriers, which is an important feature in the detection and prevention of zoonotic disease. A better capture of symptomology and health-seeking behavior data would be helpful. Another limitation of this study was that the household survey relied upon self-reporting assets, characteristics, behaviors, and risk factors which may introduce response and recall bias. Particular animal contact questions related to animal husbandry practices failed to include a distinction on whether household member were employed in that task during the time of sampling, which resulted in almost all herding household reporting engagement in these activities. Future work in this area should specify when the activity last took place and/or enlist an observational component to try and better match herding risk factors with parasite presence.

Moreover, the multistage sampling utilized relied heavily upon convenience methods which has a high likelihood of sampling bias. Sampling was done in rural communities (*baghs*) and among household groups (*khot ails*) that could be reached by four-wheel drive vehicles, revisited the following day, and their district (*soum*) could be located within a one to two day drive from our laboratory base. This excluded hard to access provinces and rural households which could have provided different insight or larger, more representative results. The study authors encourage future complementary One Health research be conducted within these regions for comparison and to better our overall understanding of disease risk and transmission pathways among marginalized groups.

Although most participating households indicated a belief in zoonotic transmission, or that animals can give disease to humans, the majority disagreed that humans can give disease to animals. Education on both zoonotic and reverse zoonotic disease risks would be beneficial within a larger One Health intervention strategy. Rural efforts to promote access to improved drinking water, effective household methods for safe storage and treatment prior to use such as disinfection through chlorination or sunlight or filtration, and indoor handwashing sites can help to prevent zoonotic enteric parasite transmission and subsequent diarrheal disease among herding families [94]. However, it must be coupled with culturally appropriate tactics to prevent transmission to humans from animal contact, to animals from human contact, between household members, between animals, and from contaminated environmental sources such as filth flies. The cultural appropriateness and acceptability of interventions will require input from members of the target community. Rural herding households should be invited stakeholders among larger One Health teams of public health professionals, veterinarians, clinicians, epidemiologists, anthropologists, ecologists, agricultural leaders, and others who have a vested interest in the health, safety, and longevity of Mongolia's human-animal connection.

## Conclusion

The diarrheal disease-causing zoonotic enteric parasites of *Cryptosporidium spp.* and *Giardia duodenalis* are putting the health of Mongolia's people, animals and environment at risk. However, the culturally and economically significant practice of keeping livestock and herding throughout Mongolia should not be discouraged but instead made safer for both humans and animals using a One Health approach. Public health and veterinary messages aimed at reducing exposure risks should be designed in tandem with insight from local herding families. Additionally, municipalities and provincial governments should work to improve water, sanitation and hygiene access and safety for all households across rural, peri-urban, and urban areas of Mongolia to improve the health of all residents.

## Supporting information

**S1 File. Household Survey Instrument.**  
(DOCX)

**S2 File. Strobe Statement Checklist.**  
(DOCX)

## Acknowledgments

The authors express their sincere gratitude to the participating study households for their time, hospitality, and support. Additionally, this work would not have been successful without the advice and wisdom of the field veterinarians of each province, exceptional fly identification by Alimaa Tsagaan of the Institute of Veterinary Medicine, multiplex real-time PCR analysis by Ulaankhuu Ankhanbaatar and Munkhduuren Shatar of the Central Veterinary Laboratory, and encouragement from lab and research colleagues of the Institute of Veterinary Medicine, the National Center for Zoonotic Disease, and the Duke University One Health team.

## Author Contributions

**Conceptualization:** Amber N. Barnes, Anu Davaasuren, Uyanga Baasandavga, Battsetseg Gonchigoo, Gregory C. Gray.

**Data curation:** Amber N. Barnes, Anu Davaasuren, Uyanga Baasandavga.

**Formal analysis:** Amber N. Barnes, Paul M. Lantos.

**Funding acquisition:** Battsetseg Gonchigoo, Gregory C. Gray.

**Investigation:** Amber N. Barnes, Anu Davaasuren, Uyanga Baasandavga.

**Methodology:** Amber N. Barnes, Anu Davaasuren, Uyanga Baasandavga, Paul M. Lantos, Battsetseg Gonchigoo, Gregory C. Gray.

**Project administration:** Amber N. Barnes, Anu Davaasuren, Uyanga Baasandavga, Battsetseg Gonchigoo, Gregory C. Gray.

**Resources:** Amber N. Barnes, Anu Davaasuren, Uyanga Baasandavga, Battsetseg Gonchigoo, Gregory C. Gray.

**Software:** Paul M. Lantos.

**Supervision:** Amber N. Barnes, Battsetseg Gonchigoo, Gregory C. Gray.

**Validation:** Battsetseg Gonchigoo, Gregory C. Gray.

**Visualization:** Amber N. Barnes, Anu Davaasuren, Uyanga Baasandavga, Paul M. Lantos.

**Writing – original draft:** Amber N. Barnes.

**Writing – review & editing:** Amber N. Barnes, Anu Davaasuren, Uyanga Baasandavga, Paul M. Lantos, Battsetseg Gonchigoo, Gregory C. Gray.

## References

1. Kotloff KL, Nataro JP, Blackwelder WC, Nasrin D, Farag TH, Panchalingam S, et al. Burden and aetiology of diarrhoeal disease in infants and young children in developing countries (the Global Enteric Multi-center Study, GEMS): a prospective, case-control study. *The Lancet*. 2013 Jul 20; 382(9888):209–22. [https://doi.org/10.1016/S0140-6736\(13\)60844-2](https://doi.org/10.1016/S0140-6736(13)60844-2) PMID: 23680352
2. Kotloff KL. The burden and etiology of diarrheal illness in developing countries. *Pediatric Clinics*. 2017 Aug 1; 64(4):799–814. <https://doi.org/10.1016/j.pcl.2017.03.006> PMID: 28734511
3. Efstratiou A, Ongerth JE, Karanis P. Waterborne transmission of protozoan parasites: review of worldwide outbreaks—an update 2011–2016. *Water research*. 2017 May 1; 114:14–22. <https://doi.org/10.1016/j.watres.2017.01.036> PMID: 28214721
4. Lanata CF, Fischer-Walker CL, Olascoaga AC, Torres CX, Aryee MJ, Black RE. Global causes of diarrheal disease mortality in children < 5 years of age: a systematic review. *PLoS one*. 2013 Sep 4; 8(9): e72788. <https://doi.org/10.1371/journal.pone.0072788> PMID: 24023773
5. Levine MM, Nasrin D, Acácio S, Bassat Q, Powell H, Tennant SM, et al. Diarrhoeal disease and subsequent risk of death in infants and children residing in low-income and middle-income countries: analysis of the GEMS case-control study and 12-month GEMS-1A follow-on study. *The Lancet Global Health*. 2020 Feb 1; 8(2):e204–14. [https://doi.org/10.1016/S2214-109X\(19\)30541-8](https://doi.org/10.1016/S2214-109X(19)30541-8) PMID: 31864916
6. Penakalapati G, Swarthout J, Delahoy MJ, McAliley L, Wodnik B, Levy K, et al. Exposure to animal feces and human health: a systematic review and proposed research priorities. *Environmental science & technology*. 2017 Oct 17; 51(20):11537–52. <https://doi.org/10.1021/acs.est.7b02811> PMID: 28926696
7. Troeger C, Forouzanfar M, Rao PC, Khalil I, Brown A, Reiner RC Jr, et al. Estimates of global, regional, and national morbidity, mortality, and aetiologies of diarrhoeal diseases: a systematic analysis for the Global Burden of Disease Study 2015. *The Lancet Infectious Diseases*. 2017 Sep 1; 17(9):909–48. [https://doi.org/10.1016/S1473-3099\(17\)30276-1](https://doi.org/10.1016/S1473-3099(17)30276-1) PMID: 28579426
8. Alum A, Absar IM, Asaad H, Rubino JR, Ijaz MK. Impact of environmental conditions on the survival of *Cryptosporidium* and *Giardia* on environmental surfaces. *Interdisciplinary perspectives on infectious diseases*. 2014 Jan 1; 2014. <https://doi.org/10.1155/2014/210385> PMID: 25045350
9. Butler AJ, Thomas MK, Pintar KD. Expert elicitation as a means to attribute 28 enteric pathogens to foodborne, waterborne, animal contact, and person-to-person transmission routes in Canada. *Foodborne pathogens and disease*. 2015 Apr 1; 12(4):335–44. <https://doi.org/10.1089/fpd.2014.1856> PMID: 25835810
10. Bingham AK, Jarroll EL Jr, Meyer EA, Radulescu S. *Giardia* sp.: physical factors of excystation in vitro, and excystation vs eosin exclusion as determinants of viability. *Experimental parasitology*. 1979; 47(2):284–291. [https://doi.org/10.1016/0014-4894\(79\)90080-8](https://doi.org/10.1016/0014-4894(79)90080-8) PMID: 35362
11. Galgamuwa LS, Iddawela WM, Dharmaratne SD. Intestinal protozoa infections, associated risk factors and clinical features among children in a low-income tea plantation community in Sri Lanka. *Int J Community Med Public Health*. 2016 Sep; 3(9):2452–8.
12. Sah RB, Bhattarai S, Yadav S, Baral R, Jha N, Pokharel PK. A study of prevalence of intestinal parasites and associated risk factors among the school children of Itahari, Eastern Region of Nepal. *Tropical parasitology*. 2013 Jul; 3(2):140. <https://doi.org/10.4103/2229-5070.122143> PMID: 24470999
13. Zhao Z, Dong H, Wang R, Zhao W, Chen G, Li S, et al. Genotyping and subtyping *Cryptosporidium parvum* and *Giardia duodenalis* carried by flies on dairy farms in Henan, China. *Parasites & Vectors*. 2014 Dec 1; 7(1):190. <https://doi.org/10.1186/1756-3305-7-190> PMID: 24742088
14. Hoffmann S, Devleeschauwer B, Aspinall W, Cooke R, Corrigan T, Havelaar A, et al. Attribution of global foodborne disease to specific foods: Findings from a World Health Organization structured expert elicitation. *PLoS One*. 2017 Sep 14; 12(9):e0183641. <https://doi.org/10.1371/journal.pone.0183641> PMID: 28910293
15. Smith HV, Caccio SM, Cook N, Nichols RA, Tait A. *Cryptosporidium* and *Giardia* as foodborne zoonoses. *Veterinary parasitology*. 2007 Oct 21; 149(1–2):29–40. <https://doi.org/10.1016/j.vetpar.2007.07.015> PMID: 17728067

16. World Health Organization. WHO estimates of the global burden of foodborne diseases: foodborne disease burden epidemiology reference group 2007–2015. World Health Organization; 2015.
17. Korich DG, Mead JR, Madore MS, Sinclair NA, Sterling CR. Effects of ozone, chlorine dioxide, chlorine, and monochloramine on *Cryptosporidium parvum* oocyst viability. *Applied and environmental microbiology*. 1990 May 1; 56(5):1423–8. <https://doi.org/10.1128/aem.56.5.1423-1428.1990> PMID: 2339894
18. Nasser AM, Tweto E, Nitzan Y. Die-off of *Cryptosporidium parvum* in soil and wastewater effluents. *Journal of applied microbiology*. 2007 Jan; 102(1):169–76. <https://doi.org/10.1111/j.1365-2672.2006.03048.x> PMID: 17184332
19. Delahoy MJ, Wodnik B, McAliley L, Penakalapati G, Swarthout J, Freeman MC, et al. Pathogens transmitted in animal feces in low-and middle-income countries. *International journal of hygiene and environmental health*. 2018 May 1; 221(4):661–76. <https://doi.org/10.1016/j.ijheh.2018.03.005> PMID: 29729998
20. Zambrano LD, Levy K, Menezes NP, Freeman MC. Human diarrhea infections associated with domestic animal husbandry: a systematic review and meta-analysis. *Transactions of the Royal Society of Tropical Medicine and Hygiene*. 2014 Jun 1; 108(6):313–25. <https://doi.org/10.1093/trstmh/tru056> PMID: 24812065
21. Fayer R. *Cryptosporidium*: a water-borne zoonotic parasite. *Veterinary parasitology*. 2004 Dec 9; 126(1–2):37–56. <https://doi.org/10.1016/j.vetpar.2004.09.004> PMID: 15567578
22. Feng Y, Xiao L. Zoonotic potential and molecular epidemiology of *Giardia* species and giardiasis. *Clinical microbiology reviews*. 2011 Jan 1; 24(1):110–40. <https://doi.org/10.1128/CMR.00033-10> PMID: 21233509
23. Thompson RA, Palmer CS, O’Handley R. The public health and clinical significance of *Giardia* and *Cryptosporidium* in domestic animals. *The veterinary journal*. 2008 Jul 1; 177(1):18–25. <https://doi.org/10.1016/j.tvjl.2007.09.022> PMID: 18032076
24. Thompson RC, Ash A. Molecular epidemiology of *Giardia* and *Cryptosporidium* infections. *Infection, Genetics and Evolution*. 2016 Jun 1; 40:315–23. <https://doi.org/10.1016/j.meegid.2015.09.028> PMID: 26458528
25. Taylor WT, Clark J, Bayarsaikhan J, Tuvshinjargal T, Jobe JT, Fitzhugh W, et al. Early Pastoral Economies and Herding Transitions in Eastern Eurasia. *Scientific reports*. 2020 Jan 22; 10(1):1–5. <https://doi.org/10.1038/s41598-019-56847-4> PMID: 31913322
26. World Bank. Press Release, Mongolia’s Millennium Millennium 2018. [Internet]. Ulaanbaatar, Mongolia; Jun 21 2019. Available from <https://www.worldbank.org/mn/news/press-release/2019/06/21/mongolias-2018-poverty-rate-estimated-at-284-percent>
27. National Statistical Office of Mongolia. Mongolian Livestock and Population Data. [Internet]. Ulaanbaatar, Mongolia; 2019. Available from <https://www.en.nso.mn>
28. Barnes AN, Davaasuren A, Baasandavga U, Gray GC. A systematic review of zoonotic enteric parasitic diseases among nomadic and pastoral people. *PloS one*. 2017 Nov 30; 12(11):e0188809. <https://doi.org/10.1371/journal.pone.0188809> PMID: 29190664
29. Bayasgalan C, Chultemdorj T, Roth F, Zinsstag J, Hattendorf J, Badmaa B, et al. Risk factors of brucellosis seropositivity in Bactrian camels of Mongolia. *BMC veterinary research*. 2018 Dec 1; 14(1):342. <https://doi.org/10.1186/s12917-018-1664-0> PMID: 30424746
30. Khatanbaatar I, Skotakova V, Byambarenchin B, Batsukh Z, Battsetseg G, Lukesova D. The Overview of Epizootiologic Situation of Equids and Ruminants in Mongolia. *Mongolian Journal of Agricultural Sciences*. 2017; 21(02):9–16.
31. Pagmadulam B, Myagmarsuren P, Yokoyama N, Battsetseg B, Nishikawa Y. Seroepidemiological study of *Toxoplasma gondii* in small ruminants (sheep and goat) in different provinces of Mongolia. *Parasitology international*. 2020 Feb 1; 74:101996. <https://doi.org/10.1016/j.parint.2019.101996> PMID: 31634631
32. Sack A, Daramragchaa U, Chuluunbaatar M, Gonchigoo B, Gray GC. Potential risk factors for zoonotic disease transmission among Mongolian herder households caring for horses and camels. *Pastoralism*. 2018 Dec; 8(1):2.
33. Honeychurch W. Pastoral nomadic voices: a Mongolian archaeology for the future. *World Archaeology*. 2010 Sep 1; 42(3):405–17.
34. Iacobucci E, Taus NS, Ueti MW, Sukhbaatar L, Bastsukh Z, Papageorgiou S, et al. Detection and genotypic characterization of *Toxoplasma gondii* DNA within the milk of Mongolian livestock. *Parasitology research*. 2019 Jun 1; 118(6):2005–8. <https://doi.org/10.1007/s00436-019-06306-w> PMID: 30982139
35. Barnes AN, Baasandavga U, Davaasuren A, Gonchigoo B, Gray GC. Knowledge and practices surrounding zoonotic disease among Mongolian herding households. *Pastoralism*. 2020 Dec; 10:1–4.

36. Tada C, Kotogaoka T, Takada M, Fukuda Y, Nakai Y. Monitoring of pathogenic microorganisms originating from nomadic livestock feces in the Tuul River basin of Mongolia. *Journal of Animal Production Environment Science*. 2017 Nov 15; 17(1): 36–45.
37. Esson CL. A One Health approach to investigating the health and prevalence of zoonotic pathogens in snow leopards, sympatric wildlife, domestic animals and humans in the South Gobi Desert in Mongolia (Doctoral dissertation, James Cook University).
38. Batsukh Z, Tsolmon B, Otgonbaatar D, Undraa B, Dolgorkhand A, Ariuntuya O. One health in Mongolia. In: Mackenzie JS, Jeggo M, Daszak P, Richt JA, eds. *One Health: The human-animal-environment interfaces in emerging infectious diseases*. Berlin, Heidelberg: Springer; 2012. p. 123–137.
39. Center for Health Development [report on the internet]. Mongolia: Health indicators, 2016; [updated 2016]. Available from [https://untobaccocontrol.org/impldb/wp-content/uploads/mongolia\\_2018\\_annex-1\\_health\\_indicator\\_2016.pdf](https://untobaccocontrol.org/impldb/wp-content/uploads/mongolia_2018_annex-1_health_indicator_2016.pdf)
40. Hong SH, Davaasuren A, Jeong YI, Abmed D, Cho SH, Lee WJ, et al. Molecular characterization of *Giardia duodenalis* and *Cryptosporidium parvum* in fecal samples of individuals in Mongolia. *The American journal of tropical medicine and hygiene*. 2014 Jan 8; 90(1):43–7. <https://doi.org/10.4269/ajtmh.13-0271> PMID: 24249428
41. Liu A, Gong B, Liu X, Shen Y, Wu Y, Zhang W, et al. A retrospective epidemiological analysis of human *Cryptosporidium* infection in China during the past three decades (1987–2018). *PLoS neglected tropical diseases*. 2020 Mar 30; 14(3):e0008146. <https://doi.org/10.1371/journal.pntd.0008146> PMID: 32226011
42. Li J, Wang H, Wang R, Zhang L. *Giardia duodenalis* infections in humans and other animals in China. *Frontiers in microbiology*. 2017 Oct 13; 8:2004. <https://doi.org/10.3389/fmicb.2017.02004> PMID: 29081771
43. Wang L, Xiao L, Duan L, Ye J, Guo Y, Guo M, et al. Concurrent infections of *Giardia duodenalis*, *Enterocytozoon bieneusi*, and *Clostridium difficile* in children during a cryptosporidiosis outbreak in a pediatric hospital in China. *PLoS Negl Trop Dis*. 2013 Sep 12; 7(9):e2437. <https://doi.org/10.1371/journal.pntd.0002437> PMID: 24069491
44. National Statistical Office of Mongolia [report]. Mongolia: Social Indicator Sample Survey-2013, Multiple Indicator Cluster Survey, Final Report. Ulaanbaatar, Mongolia; 2015. Available from <https://microdata.worldbank.org/index.php/catalog/2535>
45. Heiner M, Davaa G, Kiesecker J, McKenney B, Evans J, Enkhtsetseg T, et al. Identifying conservation priorities in the face of future development: applying development by design in the grasslands of Mongolia. *Then nature conservancy*, Arlington, VA, report to the Mongolia Ministry of Nature, Environment and Tourism. 2011; 62.
46. Karnieli A, Bayarjargal Y, Bayasgalan M, Mandakh B, Dugarjav C, Burgheimer J, et al. Do vegetation indices provide a reliable indication of vegetation degradation? A case study in the Mongolian pastures. *International Journal of Remote Sensing*. 2013 Sep 10; 34(17):6243–62.
47. United Nations Statistical Division. Mongolia. [Internet]. Ulaanbaatar, Mongolia; 2018. Available from <http://data.un.org/en/iso/mn.html>.
48. Uddin SM, Li Z, Gaillard JC, Tedoff PF, Mang HP, Lapegue J, et al. Exposure to WASH-borne hazards: A scoping study on peri-urban Ger areas in Ulaanbaatar, Mongolia. *Habitat International*. 2014 Oct 1; 44:403–11.
49. UNICEF. Equity in Public Financing of Water, Sanitation & Hygiene (WASH) Mongolia. [Internet]. Ulaanbaatar, Mongolia: UNICEF East Asia and Pacific Regional Office; June 2016. Available from [https://www.unicef.org/UNICEF\\_WASH\\_Financing\\_Mongolia.pdf](https://www.unicef.org/UNICEF_WASH_Financing_Mongolia.pdf)
50. National Statistical Office of Mongolia(b) [report]. Social Indicator Sample Survey-2018, Survey Findings Report. Ulaanbaatar, Mongolia: National Statistical Office of Mongolia; 2019. Available from <https://mics.unicef.org/surveys>
51. Krauth SJ, Coulibaly JT, Knopp S, Traoré M, N'Goran EK, Utzinger J. An in-depth analysis of a piece of shit: distribution of *Schistosoma mansoni* and hookworm eggs in human stool. *PLoS Negl Trop Dis*. 2012 Dec 20; 6(12):e1969. <https://doi.org/10.1371/journal.pntd.0001969> PMID: 23285307
52. Collinet-Adler S, Babji S, Francis M, Kattula D, Premkumar PS, Sarkar R, et al. Environmental factors associated with high fly densities and diarrhea in Vellore, India. *Applied and environmental microbiology*. 2015 Sep 1; 81(17):6053–8. <https://doi.org/10.1128/AEM.01236-15> PMID: 26116684
53. Kuk S, Cetinkaya U. Stool sample storage conditions for the preservation of *Giardia intestinalis* DNA. *Memórias do Instituto Oswaldo Cruz*. 2012 Dec; 107(8):965–8. <https://doi.org/10.1590/s0074-02762012000800001> PMID: 23295744
54. Lalonde LF, Gajadhar AA. Effect of storage media, temperature, and time on preservation of *Cryptosporidium parvum* oocysts for PCR analysis. *Veterinary parasitology*. 2009 Mar 23; 160(3–4):185–9. <https://doi.org/10.1016/j.vetpar.2008.11.022> PMID: 19128883

55. Wilke H, Robertson LJ. Preservation of *Giardia* cysts in stool samples for subsequent PCR analysis. *Journal of microbiological methods*. 2009 Sep 1; 78(3):292–6. <https://doi.org/10.1016/j.mimet.2009.06.018> PMID: 19576935
56. Gordon CA, McManus DP, Acosta LP, Olveda RM, Williams GM, Ross AG, et al. Multiplex real-time PCR monitoring of intestinal helminths in humans reveals widespread polyparasitism in Northern Samar, the Philippines. *International journal for parasitology*. 2015 Jun 1; 45(7):477–83. <https://doi.org/10.1016/j.ijpara.2015.02.011> PMID: 25858090
57. Marshall SA. Flies. The Natural History and Diversity of Diptera [book on the internet]. New York, USA. Firefly Books; 2012.
58. Graczyk TK, Grimes BH, Knight R, Da Silva AJ, Pieniazek NJ, Veal DA. Detection of *Cryptosporidium parvum* and *Giardia lamblia* carried by synanthropic flies by combined fluorescent in situ hybridization and a monoclonal antibody. *The American journal of tropical medicine and hygiene*. 2003 Feb 1; 68(2):228–32. PMID: 12641416
59. De Waal T, Liebenberg D, Venter GJ, Mienie CM, Van Hamburg H. Detection of African horse sickness virus in *Culicoides imicola* pools using RT-qPCR. *Journal of Vector Ecology*. 2016 Jun; 41(1):179–85. <https://doi.org/10.1111/jvec.12210> PMID: 27232141
60. Johnson G, Panella N, Hale K, Komar N. Detection of West Nile virus in stable flies (Diptera: Muscidae) parasitizing juvenile American white pelicans. *Journal of Medical Entomology*. 2014 Dec 1; 47(6):1205–11.
61. Clavel A, Doiz O, Morales S, Varea M, Seral C, Castillo FJ, et al. House fly (*Musca domestica*) as a transport vector of *Cryptosporidium parvum*. *Folia parasitologica*. 2002 Jan 1; 49(2):163–4. <https://doi.org/10.14411/fp.2002.029> PMID: 12194490
62. Ogunniyi TA, Olajide JS, Oyelade OJ. Human intestinal parasites associated with non-biting flies in ile-ife, Nigeria. *J Med Biol Sci Res*. 2015 Nov; 1(9):124–9.
63. Pai H.H., Ko Y.C. and Chen E.R., 2003. Cockroaches (*Periplaneta americana* and *Blattella germanica*) as potential mechanical disseminators of *Entamoeba histolytica*. *Acta tropica*, 87(3), pp.355–359. [https://doi.org/10.1016/s0001-706x\(03\)00140-2](https://doi.org/10.1016/s0001-706x(03)00140-2) PMID: 12875929
64. Szostakowska B, Kruminis-Lozowska W, Racewicz M, Knight R, Tamang L, Myjak P, et al. *Cryptosporidium parvum* and *Giardia lamblia* recovered from flies on a cattle farm and in a landfill. *Applied and environmental microbiology*. 2004 Jun 1; 70(6):3742–4. <https://doi.org/10.1128/AEM.70.6.3742-3744.2004> PMID: 15184182
65. Graham JP, Price LB, Evans SL, Graczyk TK, Silbergeld EK. Antibiotic resistant enterococci and staphylococci isolated from flies collected near confined poultry feeding operations. *Science of the total environment*. 2009 Apr 1; 407(8):2701–10. <https://doi.org/10.1016/j.scitotenv.2008.11.056> PMID: 19157515
66. Blackburn JK, Curtis A, Hadfield TL, O'Shea B, Mitchell MA, Hugh-Jones ME. Confirmation of *Bacillus anthracis* from flesh-eating flies collected during a West Texas anthrax season. *Journal of wildlife diseases*. 2010 Jul; 46(3):918–22. <https://doi.org/10.7589/0090-3558-46.3.918> PMID: 20688697
67. Conn DB, Weaver J, Tamang L, Graczyk TK. Synanthropic flies as vectors of *Cryptosporidium* and *Giardia* among livestock and wildlife in a multispecies agricultural complex. *Vector-Borne and Zoonotic Diseases*. 2007 Dec 1; 7(4):643–52. <https://doi.org/10.1089/vbz.2006.0652> PMID: 17979535
68. Shanan S, Abd H, Bayoumi M, Saeed A, Sandström G. Prevalence of protozoa species in drinking and environmental water sources in Sudan. *BioMed Research International*. 2015 Feb 18;2015. <https://doi.org/10.1155/2015/345619> PMID: 25789313
69. Nichols RA, Smith HV. Optimization of DNA extraction and molecular detection of *Cryptosporidium* oocysts in natural mineral water sources. *Journal of food protection*. 2004 Mar; 67(3):524–32. <https://doi.org/10.4315/0362-028x-67.3.524> PMID: 15035368
70. Haque R, Roy S, Siddique A, Mondal U, Rahman SM, Mondal D, et al. Multiplex real-time PCR assay for detection of *Entamoeba histolytica*, *Giardia intestinalis*, and *Cryptosporidium* spp. *The American journal of tropical medicine and hygiene*. 2007 Apr 1; 76(4):713–7. PMID: 17426176
71. Verweij JJ, Blangé RA, Templeton K, Schinkel J, Brienen EA, van Rooyen MA, et al. Simultaneous detection of *Entamoeba histolytica*, *Giardia lamblia*, and *Cryptosporidium parvum* in fecal samples by using multiplex real-time PCR. *Journal of clinical microbiology*. 2004 Mar 1; 42(3):1220–3. <https://doi.org/10.1128/JCM.42.3.1220-1223.2004> PMID: 15004079
72. World Health Organization & United Nations Children 's Fund [WHO/UNICEF]. Monitoring, WHO/UNICEF joint monitoring programme for water supply, sanitation and hygiene (JMP). [Internet]. 2019. Available from <https://washdata.org/monitoring>.
73. Bürkner PC. brms: An R package for bayesian generalized linear mixed models using Stan. *J Stat Softw*. 2016.

74. Carpenter B, Gelman A, Hoffman MD, Lee D, Goodrich B, Betancourt M, et al. Stan: A probabilistic programming language. *Journal of statistical software*. 2017 Jan 1; 76(1).
75. Omarova A, Tussupova K, Berndtsson R, Kalishev M, Sharapatova K. Protozoan parasites in drinking water: A system approach for improved water, sanitation and hygiene in developing countries. *International journal of environmental research and public health*. 2018 Mar; 15(3):495. <https://doi.org/10.3390/ijerph15030495> PMID: 29534511
76. Wright J, Gundry S, Conroy R. Household drinking water in developing countries: a systematic review of microbiological contamination between source and point-of-use. *Tropical medicine & international health*. 2004 Jan; 9(1):106–17. <https://doi.org/10.1046/j.1365-3156.2003.01160.x> PMID: 14728614
77. Daniels ME, Smith WA, Schmidt WP, Clasen T, Jenkins MW. Modeling *Cryptosporidium* and *Giardia* in ground and surface water sources in rural India: associations with latrines, livestock, damaged wells, and rainfall patterns. *Environmental science & technology*. 2016 Jul 19; 50(14):7498–507.
78. Prüss-Ustün A, Wolf J, Bartram J, Clasen T, Cumming O, Freeman MC, et al. Burden of disease from inadequate water, sanitation and hygiene for selected adverse health outcomes: An updated analysis with a focus on low-and middle-income countries. *International journal of hygiene and environmental health*. 2019 Jun 1; 222(5):765–77. <https://doi.org/10.1016/j.ijheh.2019.05.004> PMID: 31088724
79. Karthe D, Westpha K. Water and hygiene in the Kharaa River Basin, Mongolia: Current knowledge and research needs. *Geography, Environment, Sustainability*. 2017 Oct 3; 10(3):44–53.
80. Holt HR, Inthavong P, Khamlome B, Blaszak K, Keokamphe C, Somoulay V, et al. Endemicity of zoonotic diseases in pigs and humans in lowland and upland Lao PDR: identification of socio-cultural risk factors. *PLoS neglected tropical diseases*. 2016 Apr 12; 10(4):e0003913. <https://doi.org/10.1371/journal.pntd.0003913> PMID: 27070428
81. Bardosh K, Inthavong P, Xayaheuang S, Okello AL. Controlling parasites, understanding practices: the biosocial complexity of a One Health intervention for neglected zoonotic helminths in northern Lao PDR. *Social science & medicine*. 2014 Nov 1; 120:215–23. <https://doi.org/10.1016/j.socscimed.2014.09.030> PMID: 25261615
82. Macpherson C. The effect of transhumance on the epidemiology of animal diseases. *Preventive Veterinary Medicine*. 1995 Dec 1; 25(2):213–24.
83. Chavasse DC, Shier RP, Murphy OA, Huttly SR, Cousens SN, Akhtar T. Impact of fly control on childhood diarrhoea in Pakistan: community-randomised trial. *The Lancet*. 1999 Jan 2; 353(9146):22–5. [https://doi.org/10.1016/s0140-6736\(98\)03366-2](https://doi.org/10.1016/s0140-6736(98)03366-2) PMID: 10023946
84. Nazni WA, Luke H, Rozita WW, Abdullah AG, Sa'diyah I, Azahari AH, et al. Determination of the flight range and dispersal of the house fly, *Musca domestica* (L.) using mark release recapture technique. *Tropical Biomedicine*. 2005; 22(1):53–61. PMID: 16880754
85. World Health Organization. Vector control series: the housefly: training and information guide. World Health Organization; 1986.
86. Ruhlmann S. Dealing with highly contagious animal diseases under neoliberal governmentality in Mongolia. *Medicine Anthropology Theory*. 2018; 5(3):99–129.
87. Swiss Agency for Development and Cooperation [report]. Gender analysis in pastoral livestock herding in Mongolia. Ulaanbaatar, Mongolia; 2015. Available from [https://www.eda.admin.ch/dam/countries/countries-content/mongolia/en/AFS\\_Gender\\_Pastoral\\_2015\\_Mongolia.pdf](https://www.eda.admin.ch/dam/countries/countries-content/mongolia/en/AFS_Gender_Pastoral_2015_Mongolia.pdf)
88. Chuluundorj O. A multi-level study of vulnerability of Mongolian pastoralists to natural hazards and its consequences on individual and household well-being. University of Colorado at Denver; 2006. <https://doi.org/10.1080/17441690500321418> PMID: 19153892
89. Jagai JS, Castronovo DA, Monchak J, Naumova EN. Seasonality of cryptosporidiosis: A meta-analysis approach. *Environmental research*. 2009 May 1; 109(4):465–78. <https://doi.org/10.1016/j.envres.2009.02.008> PMID: 19328462
90. Batima P, Natsagdorj L, Gombluudev P, Erdenetsetseg B. Observed climate change in Mongolia. *Assess Imp Adapt Clim Change Work Pap*. 2005 Jun; 12:1–26.
91. Robertson LJ, Gjerde BK. Fate of *Cryptosporidium* oocysts and *Giardia* cysts in the Norwegian aquatic environment over winter. *Microbial ecology*. 2006 Nov 1; 52(4):597–602. <https://doi.org/10.1007/s00248-006-9005-4> PMID: 17082998
92. Odontsetseg N, Uuganbayar D, Tserendorj S, Adiyasuren Z. Animal and human rabies in Mongolia. *Revue Scientifique Et Technique-Office International Des Epizooties*. 2009; 28(3):995–1003. <https://doi.org/10.20506/rst.28.3.1942> PMID: 20462156
93. Qi M, Zhou H, Wang H, Wang R, Xiao L, Arrowood MJ, et al. Molecular identification of *Cryptosporidium* spp. and *Giardia duodenalis* in grazing horses from Xinjiang, China. *Veterinary parasitology*. 2015 Apr 30; 209(3–4):169–72. <https://doi.org/10.1016/j.vetpar.2015.02.030> PMID: 25794943

94. Clasen TF, Alexander KT, Sinclair D, Boisson S, Peletz R, Chang HH, et al. Interventions to improve water quality for preventing diarrhoea. Cochrane database of systematic reviews. 2015(10). <https://doi.org/10.1002/14651858.CD004794.pub3> PMID: 26488938
